# Supplementary material for: Surface-enhanced Raman scattering of self-assembled thiol monolayers and supported lipid membranes on thin anodic porous alumina
Source: publisher site journal article supplement (doi:10.3762/bjnano.8.8), 2017-01-09
Supplement: Additional file 1 [file 2190-4286-8-8-S1.pdf]

**Supporting Information**  
**for**  
**Surface-enhanced Raman scattering of self-**  
**assembled thiol monolayers and supported lipid**  
**membranes on thin anodic porous alumina**

Marco Salerno<sup>1\*</sup>, Amirreza Shayganpour<sup>1,2</sup>, Barbara Salis<sup>1,2</sup> and Silvia Dante<sup>1</sup>

Address: <sup>1</sup>Department of Nanophysics, Istituto Italiano di Tecnologia, via Morego 30, I-16163 Genova, Italy and <sup>2</sup>Department of Bioengineering and Robotics, University of Genova, viale Causa 13, I-16145 Genova, Italy

Email: Marco Salerno - marco.salerno@iit.it

\* Corresponding author

**Additional figures**

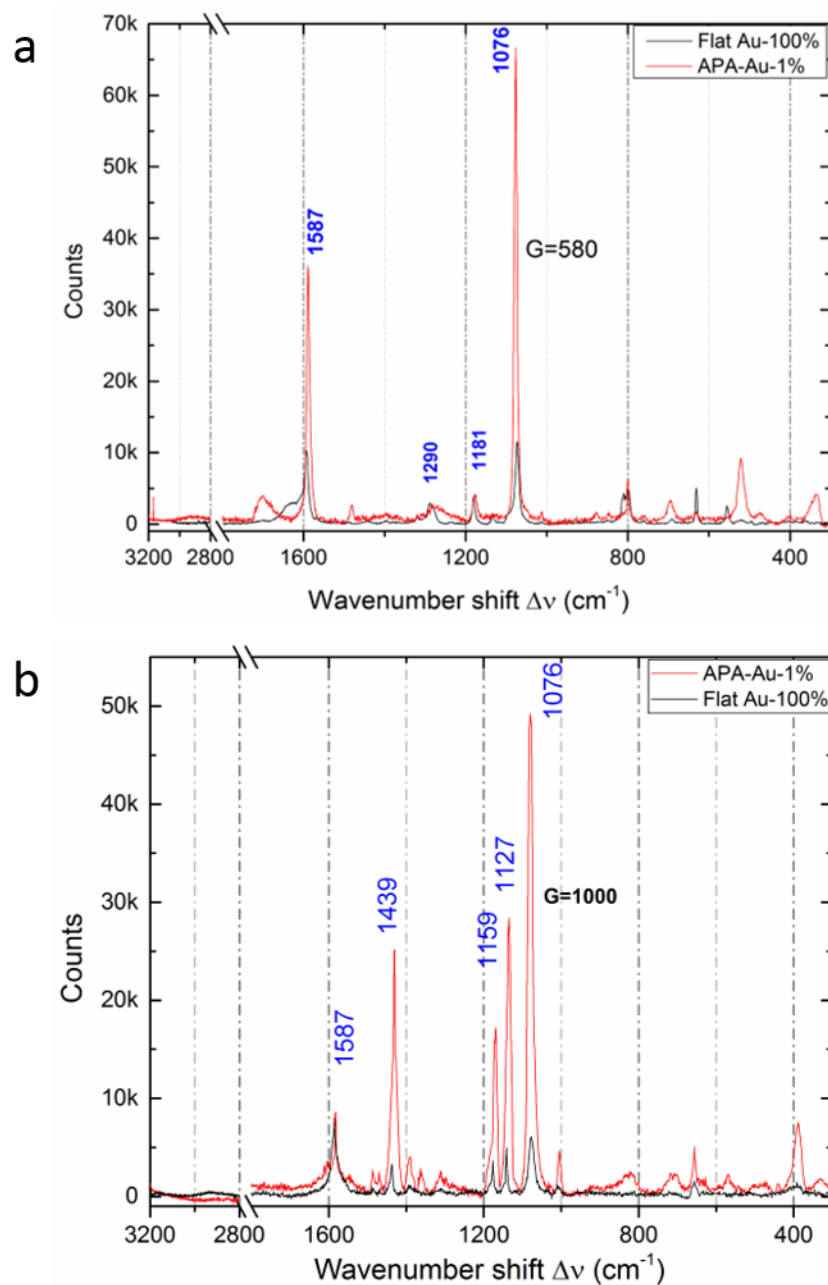

**Figure S1:** Comparison of Raman spectra of thiols after adsorption to either flat Au or tAPA–Au substrates: a) MbA, and b) AT. The enhancement is appearing clearly (consider also the different laser power, see inset legend).

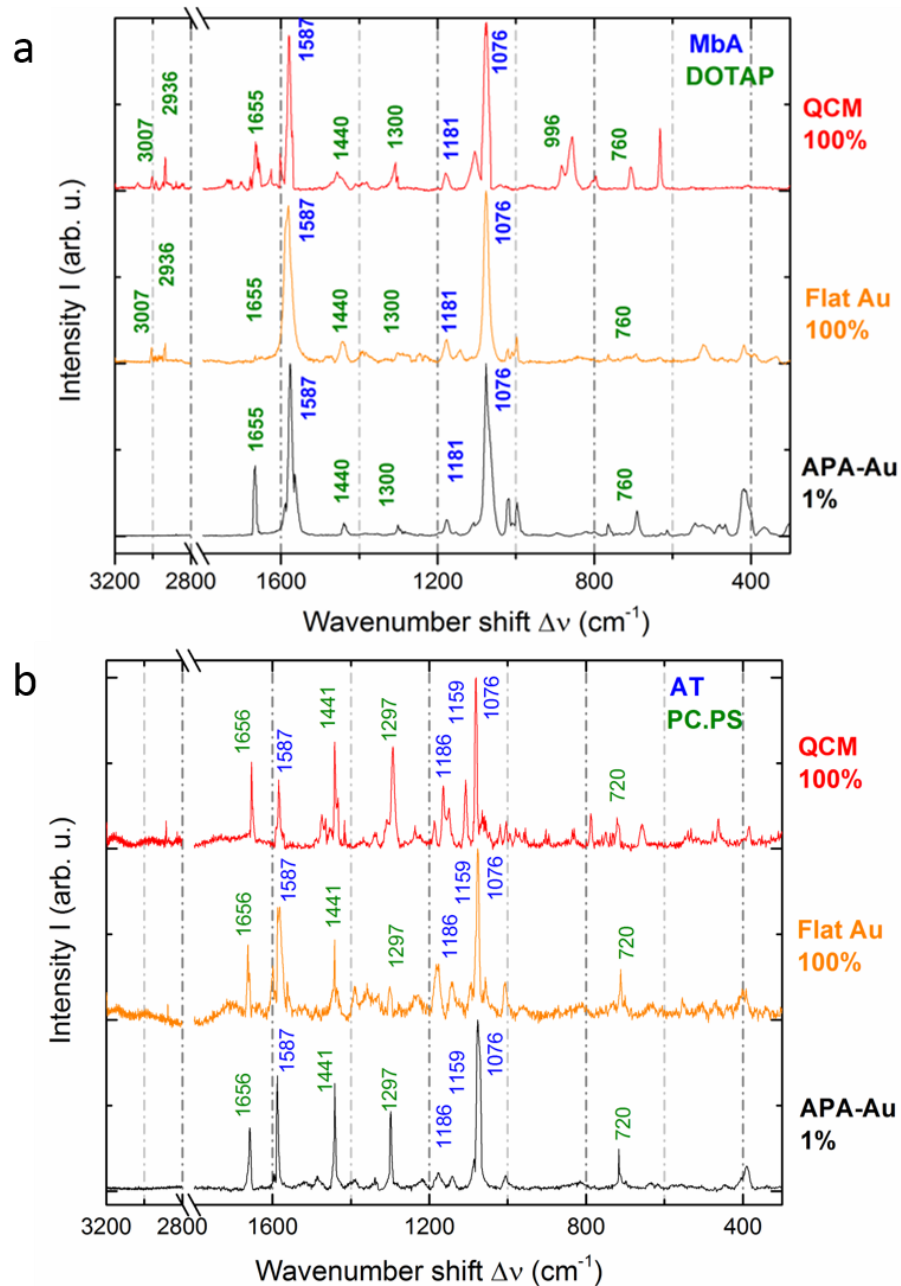

**Figure S2:** Raman spectra of the thiol-SLB systems on all the different substrates considered in this work, namely flat Au, quartz-Au, and tAPA-Au. a) MbA-DOTAP, b) AT-POPC/POPS, plotted together for easiest comparison of the respective features.
